# Supplementary material for: Critical Role of Zur and SmtB in Zinc Homeostasis of Mycobacterium smegmatis
Source: PubMed Central journal article supplement (PMC7174638; doi:10.1128/msystems.00880-19), 2020-04-21
Supplement: mSystems.00880-19-st001.pdf [file mSystems.00880-19-st001.pdf]

**Table S1: Bacterial strains and plasmids used in this study**

**Bacterial strains**

|                                                                                   |                                                                                                                                               |                      |
|-----------------------------------------------------------------------------------|-----------------------------------------------------------------------------------------------------------------------------------------------|----------------------|
| <i>Escherichia coli</i> DH5aF <sup>+</sup>                                        | F <sup>+</sup> endA1 hsdR17 (r <sub>K</sub> - mx- supE44 thi-1 recA1 gyrA (Nair relA1 Δ(lacZYA-argF)U169 deoR [q80dlacΔ(lacZ)]M15]            | Raleigh et al., 1989 |
| <i>M. smegmatis</i> mc <sup>2</sup> 155                                           | Transformable strain of the isolate M. smegmatis ATCC 607                                                                                     | Snapper et al., 1990 |
| <i>M. smegmatis</i> Δ <i>zur</i> (MSMEGΔ <i>zur</i> )                             | markerless <i>zur</i> ( <i>msmeg</i> 4487) deletion mutant of <i>M. smegmatis</i> mc <sup>2</sup> 155                                         | Eckelt et al., 2014  |
| <i>M. smegmatis</i> Δ <i>smt</i> B (MSMEGΔ <i>smt</i> B)                          | markerless <i>smt</i> B ( <i>msmeg</i> 4486) deletion mutant of <i>M. smegmatis</i> mc <sup>2</sup> 155                                       | this work            |
| <i>M. smegmatis</i> Δ <i>smt</i> BΔ <i>zur</i> (MSMEGΔ <i>smt</i> BΔ <i>zur</i> ) | markerless <i>smt</i> B- <i>zur</i> ( <i>msmeg</i> 4486) doublemutant of <i>M. smegmatis</i> mc <sup>2</sup> 155                              | this work            |
| MSMEGΔ <i>zur</i> <sup>C</sup>                                                    | MSMEGΔ <i>zur</i> complemented with pMV306hyg containing <i>msmeg</i> 4487 under control of the <i>msmeg</i> 4486 promoter                    | this work            |
| MSMEGΔ <i>smt</i> B <sup>C</sup>                                                  | MSMEGΔ <i>smt</i> B complemented with pMV306hyg containing <i>msmeg</i> 4486 under control of its own promoter                                | this work            |
| MSMEGΔ <i>smt</i> BΔ <i>zur</i> <sup>C</sup>                                      | MSMEGΔ <i>smt</i> B- <i>zur</i> complemented with pMV306hyg containing <i>msmeg</i> 4486-4487 under control of the <i>msmeg</i> 4486 promoter | this work            |
| MSMEGΔ <i>smt</i> B <sup>CF</sup> lag                                             | MSMEGΔ <i>smt</i> B complemented with pMV306hyg containing FLAG-tagged <i>msmeg</i> 4486 under control of its own promoter                    | this work            |
| MSMEGΔ <i>zur</i> <sup>CHA</sup>                                                  | MSMEGΔ <i>zur</i> complemented with pMV306hyg containing HA-tagged <i>msmeg</i> 4487 under control of the <i>msmeg</i> 4486 promoter          | this work            |

**Plasmids**

|                                     |                                                                                                                                                    |                                           |
|-------------------------------------|----------------------------------------------------------------------------------------------------------------------------------------------------|-------------------------------------------|
| pJET <sup>TM</sup> 1.2              | subcloning blunt end suicide vector, <i>amp</i>                                                                                                    | ThermoFisher Scientific, Waltham, MA, USA |
| p2NIL                               | <i>E. coli</i> - mycobacterium shuttle vector for gene manipulation, <i>kan</i>                                                                    | Parish & Stoker 2000                      |
| pGOAL19                             | <i>hyg</i> , P <sub>AGS5</sub> - <i>lacZ</i> , P <sub>19660</sub> - <i>sacB</i> , <i>PacI</i> cassette vector, <i>amp</i>                          | Parish & Stoker 2000                      |
| pMV306hyg                           | integrative <i>E. coli</i> - mycobacterium shuttle vector, <i>hyg</i>                                                                              | Stover et al. 1991                        |
| pMV-MS <i>smt</i> B                 | pMV306hyg containing <i>msmeg</i> 4486 under its own promoter                                                                                      | this work                                 |
| pMV-MS <i>smt</i> B <sup>Flag</sup> | pMV306hyg containing FLAG-tagged <i>msmeg</i> 4486 under its own promoter                                                                          | this work                                 |
| pMV-MS <i>zur</i>                   | pMV306hyg containing <i>msmeg</i> 4487 under control of the <i>msmeg</i> 4486 promoter                                                             | this work                                 |
| pMV-MS <i>zur</i> <sup>HA</sup>     | pMV306hyg containing HA-tagged <i>msmeg</i> 4487 under control of the <i>msmeg</i> 4486 promoter                                                   | this work                                 |
| pMV-MS <i>smt</i> B <i>zur</i>      | pMV306hyg containing <i>msmeg</i> 4486 and <i>msmeg</i> 4487 under its own promoter                                                                | this work                                 |
| p2NIL_MSMEG4486_AB                  | p2NIL containing 1500 bp up- and downstream fragments of <i>msmeg</i> 4486                                                                         | this work                                 |
| p2NIL_MSMEG4486_Del                 | p2NIL containing <i>PacI</i> restricted selection marker gene cassette of pGOAL19 and 1500 bp up- and downstream fragments of <i>msmeg</i> 4486    | this work                                 |
| p2NIL_MSMEG4486-87_AB               | p2NIL containing 1500 bp up- and downstream fragments of <i>msmeg</i> 4486-87                                                                      | this work                                 |
| p2NIL_MSMEG4486-87_Del              | p2NIL containing <i>PacI</i> restricted selection marker gene cassette of pGOAL19 and 1500 bp up- and downstream fragments of <i>msmeg</i> 4486-87 | this work                                 |
| pJEM15                              | promoterless <i>E. coli</i> - mycobacterium shuttle vector for <i>lacZ</i> -fusion, <i>kan</i>                                                     | Timm et al. 1994                          |
| pJEM-MSS <i>smt</i> B1              | pJEM15 containing 471 bp 5'UTR of <i>msmeg</i> 4486 (pos. 4568740-4569210) <sup>a</sup>                                                            | this work                                 |
| pJEM-MS0755-1                       | pJEM15 containing 150 bp 5'UTR of <i>msmeg</i> 0755 (pos. 842101-842250) <sup>a</sup>                                                              | this work                                 |

<sup>a</sup> The position numbers given related to GenBank accession no. NC\_008596

Raleigh FA, Lech K, Brent R 1989: Selected topics from classical bacterial genetics. In Current protocols in molecular biology. Edited by Ausubel FM. New York, USA: Publishing Associates and Wiley Interscience:1.4.1-1.4.14.  
 Snapper SB, Melton RE, Mustafa S, Kieser T, Jacobs WR Jr. 1990. Isolation and characterization of efficient plasmid transformation mutants of Mycobacterium smegmatis. Mol.Microbiol. 4.11 : 1911-19.  
 Eckelt E, Jarek M, Fromke C, Meens J, Goethe R. 2014. Identification of a lineage specific zinc responsive genomic island in Mycobacterium avium ssp. paratuberculosis. BMC Genomics 15:1076.  
 Parish T, Stoker NG. 2000. Use of a flexible cassette method to generate a double unmarked Mycobacterium tuberculosis tyA plcABC mutant by gene replacement. Microbiology 146 (Pt 8):1969-1975.  
 Stover CK, de IC, V, Fuerst TR, Burlein JE, Benson LA, Bennett LT 1991: New use of BCG for recombinant vaccines. Nature, 351: 456-460.  
 Timm J, Lim EM, Gicquel B 1994: Escherichia coli-mycobacteria shuttle vectors for operon and gene fusions to lacZ: the pJEM. J Bacteriol, 176:6749-6753.
