# Supplementary material for: Critical Role of Zur and SmtB in Zinc Homeostasis of Mycobacterium smegmatis
Source: PubMed Central journal article supplement (PMC7174638; doi:10.1128/msystems.00880-19), 2020-04-21
Supplement: mSystems.00880-19-st002.pdf [file mSystems.00880-19-st002.pdf]

Table S2: Oligonucleotides used in this study

| No. | Oligonucleotides        | Description or sequence (5' to 3')                                                                                                                                                                              | Source/ reference   |
|-----|-------------------------|-----------------------------------------------------------------------------------------------------------------------------------------------------------------------------------------------------------------|---------------------|
| 1   | oMSMEG_4486-A fw        | GATA <u>AGCTT</u> ACACCTTGTGATCGCGATG<br>(forward primer situated at position 4567714-4567733) <sup>a</sup> , <i>Hind</i> III restriction site underlined                                                       | this work           |
| 2   | oMSMEG_4486-A rev       | GATC <u>GTCCTCGTGGTCGGCCCTCG</u><br>(reverse primer situated at position 4569214-4569229) <sup>a</sup> , <i>Bsm</i> BI restriction site underlined                                                              | this work           |
| 3   | oMSMEG_4486-B fw        | ATC <u>GCTCTCGACCAGCCAGCGAGGACCG</u><br>(forward primer situated at position 4569525-4569537) <sup>a</sup> , <i>Bsm</i> BI restriction site underlined                                                          | this work           |
| 4   | oMSMEG_4486-B rev       | CT <u>GATCCACCTGCACCGCGCGACAT</u><br>(reverse primer situated at position 4571019-4571038) <sup>a</sup> , <i>Kpn</i> I restriction site underlined                                                              | this work           |
| 5   | oMSMEG_4486-4487B_fw    | GATC <u>GCTCTCGACCAATCAGGTGAGGAAC</u><br>(forward primer situated at position 4569952-4569965) <sup>a</sup> , <i>Bsm</i> BI restriction site underlined                                                         | this work           |
| 6   | oMSMEG_4487B_rev        | CAT <u>GCTACCGGCACAAGATGGGTGAGGCGGTGCTATC</u><br>(reverse primer situated at position 4571423-4571451) <sup>a</sup> , <i>Kpn</i> I restriction site underlined                                                  | Eckelt et al., 2014 |
| 7   | oMSMEG_4486-4487-Del_fw | CGTAGATCTCGCCGATTGG<br>(forward primer situated at position 4568989-4569008) <sup>a</sup>                                                                                                                       | this work           |
| 8   | oMSMEG_4487-Del_rev     | GTGAGGTCGTGAGGAGTTG<br>(reverse primer situated at position 4570202-4570221) <sup>a</sup>                                                                                                                       | this work           |
| 9   | oRTMSMEG-furB fw        | CACCGGTGAGTCGGTGTA<br>(forward primer situated at position 4569735-4569752) <sup>a</sup>                                                                                                                        | this work           |
| 10  | oRTMSMEG-furB rev       | CTCGATCGTGGCTGAC<br>(reverse primer situated at position 4569880-4569897) <sup>a</sup>                                                                                                                          | this work           |
| 11  | oRTmsmeg4486 fw         | ATCGCGATCGTTTTGCAG<br>(forward primer situated at position 4569317-4569334) <sup>a</sup>                                                                                                                        | this work           |
| 12  | oRTmsmeg4486 rev        | GAGCCGGTAGAGCACCTC<br>(reverse primer situated at position 4569461-4569478) <sup>a</sup>                                                                                                                        | this work           |
| 13  | oMS4487-K1              | GATC <u>TCTAGAGTAGCGAGTTACCGGGTGAAC</u><br>(forward primer situated at position 4569076-4569098) <sup>a</sup> , <i>Xba</i> I restriction site underlined                                                        | this work           |
| 14  | oMS4487-K2              | GATC <u>AAAGCTTATCATCAGCTGTGGTCCCGGGCGGCGG</u><br>(reverse primer situated at position 4569928-44569951) <sup>a</sup> , <i>Hind</i> III restriction site underlined                                             | this work           |
| 15  | oMS4487-K5              | GATC <u>AAAGCTTATCATCACCTGCGGTCCTCGCTGGCGTG</u><br>(reverse primer situated at position 4569521-4569544) <sup>a</sup> , <i>Hind</i> III restriction site underlined                                             | this work           |
| 16  | oSmtB-FlagOL_fw         | <b>AGAGATGACGACAGTATGATGATAAGCTTATCGATGTCGACGTA</b><br>(forward primer situated at position 4569172-4569208) <sup>a</sup> , bases of FLAG-tag bold, bases of pMV plasmid underlined                             | this work           |
| 17  | oSmtB-FlagOL_rev        | <b>CATCGCTTTGAGTCCCTGCGGTCTCGCTGGCGTGGCGGATC</b><br>(reverse primer situated at position 4569514-4569541) <sup>a</sup> , bases of FLAG-tag bold                                                                 | this work           |
| 18  | oFurB-CFlag-HA_fw       | GATC <u>CAGCTGTAGCGAGTTACCGGGTGAACCCG</u><br>(forward primer situated at position 4569076-4569101) <sup>a</sup> , <i>Pvu</i> II restriction site underlined                                                     | this work           |
| 19  | oFurB-CHA_rev           | GATC <u>AAAGCTTCAAGCGTAATCTGGAACATCGTATGGGTAC</u> GCTCGTTCCCGGGCGGCGG<br>(reverse primer situated at position 4569929-4569948) <sup>a</sup> , <i>Hind</i> III restriction site underlined, bases of HA-tag bold | this work           |
| 20  | oRTmsmeg_0755fw         | GGCGCTATATGGAGGTC<br>(forward primer situated at position 841645-841662) <sup>a</sup>                                                                                                                           | this work           |
| 21  | oRTmsmeg_0755rev        | GTGACGATTGACAGGAT<br>(reverse primer situated at position 841476-841494) <sup>a</sup>                                                                                                                           | this work           |
| 22  | oRTmsmeg_6069fw         | AGTACGCATCGTCGAGTTCA<br>(forward primer situated at position 6134480-6134499) <sup>a</sup>                                                                                                                      | this work           |
| 23  | oRTmsmeg_6069rev        | GCTGATTCGATCCACATGAC<br>(reverse primer situated at position 6134610-6134629) <sup>a</sup>                                                                                                                      | this work           |
| 24  | oRT_MSMEG_3084fw        | GTGCCAAGAAGGTCATCATC<br>(forward primer situated at position 3157638-3157657) <sup>a</sup>                                                                                                                      | Eckelt et al., 2014 |
| 25  | oRT_MSMEG_3084rev       | ACTCGTCATTGAGCACCTTG<br>(reverse primer situated at position 3157780-3157799) <sup>a</sup>                                                                                                                      | Eckelt et al., 2014 |
| 26  | oJEM-MSSmtB1_fw         | GATC <u>AGTACTTCTCGCGTACGCTCTCT</u><br>(forward primer situated at position 4568740-4568757) <sup>a</sup> , <i>Sca</i> I restriction site underlined                                                            | this work           |
| 27  | oJEM-MSSmtB1_rev        | CAT <u>GATCCTGTTGCGTCAAATTGGAAA</u><br>(reverse primer situated at position 4569192-4569210) <sup>a</sup> , <i>Bam</i> HI restriction site underlined                                                           | this work           |
| 28  | oJEM-MS0755-1_fw        | GATC <u>AGTACTTGGGTTGCGGAAGTCCGG</u><br>(forward primer situated at position 842250-842233) <sup>a</sup> , <i>Sca</i> I restriction site underlined                                                             | this work           |
| 29  | oJEM-MS0755-1_rev       | CAT <u>GATCCTGTTGCGGCGCCCAATTCCC</u><br>(reverse primer situated at position 842101-842115) <sup>a</sup> , <i>Bam</i> HI restriction site underlined                                                            | this work           |
| 30  | oCHIP-MSsmtB_fw         | GGTGCAACAGAGTAGCGAGT<br>(forward primer situated at position 4569065-4569084) <sup>a</sup>                                                                                                                      | this work           |
| 31  | oCHIP-MSsmtB_rev        | GTGTTGCGTCAAATTGGAAA<br>(reverse primer situated at position 4569192-4569211) <sup>a</sup>                                                                                                                      | this work           |
| 32  | oCHIP-MSZItA_fw         | GTGTGGTACTGTGATCGTG<br>(forward primer situated at position 842084-842103) <sup>a</sup>                                                                                                                         | this work           |
| 33  | oCHIP-MSZItA_rev        | GTGGTTGCTGCGTCAT<br>(reverse primer situated at position 842208-842225) <sup>a</sup>                                                                                                                            | this work           |
| 34  | oCHIP-MSzur_fw          | CACCATCACCCACCTG<br>(forward primer situated at position 4569769-4569786) <sup>a</sup>                                                                                                                          | this work           |
| 35  | oCHIP-MSzur_rev         | CTCGATCGTGGCTGAC<br>(reverse primer situated at position 4569880-4569867) <sup>a</sup>                                                                                                                          | this work           |
| 36  | oCHIP-MSZItAint_fw      | GTGGTGACGGTACGATG<br>(forward primer situated at position 841586-841603) <sup>a</sup>                                                                                                                           | this work           |
| 37  | oCHIP-MSZItAint_rev     | GGCGCTATATGGAGGTC<br>(reverse primer situated at position 841645-841662) <sup>a</sup>                                                                                                                           | this work           |
| 38  | oRTmsmeg0750_fw         | CTCGTCTTCATCGAGTC<br>(forward primer situated at position 838645-838664) <sup>a</sup>                                                                                                                           | this work           |
| 39  | oRTmsmeg0750_rev        | CCGATGATGTAACCCACCT<br>(reverse primer situated at position 838471-838489) <sup>a</sup>                                                                                                                         | this work           |
| 40  | oRTmsmeg4488 fw         | ACGCCATCTCTCGATCT<br>(forward primer situated at position 4570051-4570068) <sup>a</sup>                                                                                                                         | this work           |
| 41  | oRTmsmeg4488 rev        | TGCACCGTAGGTCGT<br>(reverse primer situated at position 4570212-4570227) <sup>a</sup>                                                                                                                           | this work           |

<sup>a</sup> The position numbers given related to GenBank accession no. NC\_008596
