# Supplementary material for: Critical Role of Zur and SmtB in Zinc Homeostasis of Mycobacterium smegmatis
Source: PubMed Central journal article supplement (PMC7174638; doi:10.1128/msystems.00880-19), 2020-04-21
Supplement: mSystems.00880-19-st003.pdf [file mSystems.00880-19-st003.pdf]

Table S3: Genes differentially expressed in MSMEG $\Delta$ smtB $\Delta$ zur

| Orthologue genes (% similarity) |            |                 |                |          |                |                              |                                                                       |                           |
|---------------------------------|------------|-----------------|----------------|----------|----------------|------------------------------|-----------------------------------------------------------------------|---------------------------|
| RCN <sup>a</sup>                | Annotation | MAP             | Mtb            | q-value  | Fold change    |                              | Putative function <sup>d</sup>                                        |                           |
|                                 |            |                 |                |          | $\Delta\Delta$ | $\Delta$ smtB / $\Delta$ zur |                                                                       |                           |
| -                               | MSMEG_0217 |                 |                | < 0.0001 | 4.92           |                              | alcohol dehydrogenase                                                 |                           |
| -                               | MSMEG_0302 |                 |                | < 0.0001 | 4.06           |                              | peptidase, S9A/B/C families                                           |                           |
| -                               | MSMEG_0424 |                 |                | < 0.0001 | 4.56           |                              | Hsp20/alpha crystallin family protein                                 |                           |
| -                               | MSMEG_0755 | MAP3865c (76.8) | Rv0359 (68.8)  | < 0.0001 | 64.08          | 80.92                        | cobalt-zinc-cadmium resistance protein                                |                           |
| groEL                           | MSMEG_0880 | MAP3936 (95.0)  | Rv0440 (93.4)  | < 0.0001 | 6.62           | 7.94                         | molecular chaperone GroEL                                             |                           |
| -                               | MSMEG_1122 | -               | -              | < 0.0001 | 6.14           | 4.69                         | hypothetical protein                                                  |                           |
| -                               | MSMEG_1123 | MAP1730c (43.1) | -              | < 0.0001 | 7.5            | 8.64                         | cobalamin synthesis protein                                           |                           |
| -                               | MSMEG_1236 |                 |                | < 0.0001 | 4.09           |                              | Mpr protein                                                           |                           |
| -                               | MSMEG_1392 |                 |                | < 0.0001 | 6.79           |                              | alcohol dehydrogenase                                                 |                           |
| groES                           | MSMEG_1582 | MAP4264 (96.0)  | Rv3418c (99.0) | < 0.0001 | 4.66           | 5.23                         | co-chaperonin GroES                                                   |                           |
| groEL                           | MSMEG_1583 | MAP4265 (82.5)  | Rv3417c (81.1) | < 0.0001 | 4.18           | 6.02                         | molecular chaperone GroEL                                             |                           |
| aspA                            | MSMEG_1677 |                 |                | < 0.0001 | -4.01          |                              | aspartate ammonia-lyase                                               |                           |
| mmsA                            | MSMEG_2449 |                 |                | < 0.0001 | 9.04           |                              | methylmalonate-semialdehyde dehydrogenase                             |                           |
| -                               | MSMEG_2450 |                 |                | < 0.0001 | 5.31           |                              | hypothetical protein                                                  |                           |
| -                               | MSMEG_3297 |                 |                | < 0.0001 | -5.07          |                              | CadC family transcriptional regulator                                 |                           |
| -                               | MSMEG_3300 |                 |                | < 0.0001 | -7.0           |                              | oxidoreductase, Gfo/ldh/MocA family protein                           |                           |
| -                               | MSMEG_3301 |                 |                | < 0.0001 | -4.36          |                              | hypothetical protein                                                  |                           |
| thpD                            | MSMEG_3898 | -               | -              | < 0.0001 | 4.44           | -4.94                        | ectoine hydroxylase                                                   |                           |
| ectC                            | MSMEG_3899 | -               | -              | < 0.0001 | 4.55           | -6.47                        | L-ectoine synthase                                                    |                           |
| -                               | MSMEG_3900 | -               | -              | < 0.0001 | (-3.86)        | -5.74                        | diaminobutyrate-2-oxoglutarate aminotransferase                       |                           |
| -                               | MSMEG_3901 | -               | -              | < 0.0001 | (-2.82)        | -4.05                        | L-2,4-diaminobutyric acid acetyltransferase                           |                           |
| -                               | MSMEG_3946 |                 |                | < 0.0001 | 4.16           |                              | transmembrane protein                                                 |                           |
| -                               | MSMEG_3948 |                 |                | < 0.0001 | 4.05           |                              | acyltransferase                                                       |                           |
| -                               | MSMEG_3959 | -               | -              | < 0.0001 | 4.7            | 4.40                         | transcriptional regulator                                             |                           |
| -                               | MSMEG_3960 | -               | Rv0067c (45.8) | < 0.0001 | 8.11           | 7.56                         | transcriptional regulator                                             |                           |
| -                               | MSMEG_4207 |                 |                | < 0.0001 | -43.0          |                              | universal stress protein family protein                               |                           |
| -                               | MSMEG_4208 |                 |                | < 0.0001 | -45.33         |                              | integral membrane protein                                             |                           |
| -                               | MSMEG_4209 |                 |                | < 0.0001 | -91.0          |                              | integral membrane protein                                             |                           |
| -                               | MSMEG_4210 |                 |                | < 0.0001 | -57.75         |                              | hypothetical protein                                                  |                           |
| -                               | MSMEG_4486 |                 |                | < 0.0001 | -13.5          | 94.76                        | ArsR family transcriptional regulator                                 |                           |
| cysNC                           | MSMEG_4978 |                 |                | < 0.0001 | -4.43          |                              | bifunctional sulfate adenyltransferase subunit 1/adenylsulfate kinase |                           |
| cysD                            | MSMEG_4979 |                 |                | < 0.0001 | -4.29          |                              | sulfate adenyltransferase subunit 2                                   |                           |
| -                               | MSMEG_5021 | -               | -              | < 0.0001 | -6.08          | -10.57                       | alcohol dehydrogenase                                                 |                           |
| -                               | MSMEG_5022 | -               | -              | < 0.0001 | -5.91          | -21.67                       | flavin-containing monooxygenase FMO                                   |                           |
| -                               | MSMEG_5117 | MAP2592c (71.6) | Rv1188 (68.3)  | < 0.0001 | 5.9            | 4.32                         | proline dehydrogenase                                                 |                           |
| -                               | MSMEG_5241 |                 |                | < 0.0001 | 4.29           |                              | GAF family protein                                                    |                           |
| -                               | MSMEG_5244 |                 |                | < 0.0001 | 4.19           |                              | DevR family transcriptional regulator                                 |                           |
| -                               | MSMEG_5576 |                 |                | < 0.0001 | 5.67           |                              | D-mannonate oxidoreductase                                            |                           |
| -                               | MSMEG_5906 |                 |                | < 0.0001 | 4.18           |                              | acyl-CoA dehydrogenase                                                |                           |
| -                               | MSMEG_5907 |                 |                | < 0.0001 | 4.50           |                              | acyl-CoA dehydrogenase                                                |                           |
| -                               | MSMEG_5908 |                 |                | < 0.0001 | 6.33           |                              | acyl-CoA synthetase                                                   |                           |
| -                               | MSMEG_5909 |                 |                | < 0.0001 | 6.22           |                              | oxidoreductase                                                        |                           |
| -                               | MSMEG_5913 |                 |                | < 0.0001 | 4.77           |                              | dioxygenase                                                           |                           |
| -                               | MSMEG_5922 |                 |                | < 0.0001 | 7.45           |                              | lipid-transfer protein                                                |                           |
| -                               | MSMEG_5923 |                 |                | < 0.0001 | 5.0            |                              | acetyl-CoA acetyltransferase                                          |                           |
| -                               | MSMEG_5992 |                 |                | < 0.0001 | 5.66           |                              | hypothetical protein                                                  |                           |
| -                               | MSMEG_5993 |                 |                | < 0.0001 | 5.82           |                              | acyl-CoA dehydrogenase                                                |                           |
| -                               | MSMEG_5994 |                 |                | < 0.0001 | 6.43           |                              | acyl-CoA dehydrogenase                                                |                           |
| -                               | MSMEG_5995 |                 |                | < 0.0001 | 4.89           |                              | P450 heme-thiolate protein                                            |                           |
| -                               | MSMEG_5997 |                 |                | < 0.0001 | 4.44           |                              | hypothetical protein                                                  |                           |
| -                               | MSMEG_5998 |                 |                | < 0.0001 | 4.21           |                              | hypothetical protein                                                  |                           |
| -                               | MSMEG_6037 |                 |                | < 0.0001 | 4.01           |                              | 2-hydroxy-6-ketono-2,4-dienedioic acid hydrolase                      |                           |
| -                               | MSMEG_6045 | MAP3774c (70.1) | Rv2060 (43.7)  | < 0.0001 | 24.42          | 24.62                        | heavy metal ABC transporter inner membrane protein                    |                           |
| -                               | MSMEG_6046 | MAP3775c (61.2) | -              | < 0.0001 | 19.9           | 20.65                        | ABC transporter ATP-binding protein                                   |                           |
| -                               | MSMEG_6047 | MAP3776c (56.4) | -              | < 0.0001 | 25.5           | 26.24                        | cation ABC transporter periplasmic cation-binding protein             |                           |
| -                               | MSMEG_6048 | MAP3772c (72.6) | -              | < 0.0001 | 10.000 2,903.0 | 3,288.5                      | cobalamin synthesis protein/P47K                                      |                           |
| -                               | MSMEG_6049 | -               | -              | < 0.0001 | 443.56         | 494.44                       | hypothetical protein                                                  |                           |
| -                               | MSMEG_6050 | -               | -              | < 0.0001 | 849.0          | 917.25                       | solute-binding lipoprotein                                            |                           |
| -                               | MSMEG_6051 | -               | -              | < 0.0001 | 632.0          | 777.0                        | pseudo ABC transporter transmembrane protein                          |                           |
| -                               | MSMEG_6052 | -               | -              | < 0.0001 | 23.42          | 18.17                        | ABC transporter ATP-binding protein                                   |                           |
| bluB                            | MSMEG_6053 |                 |                | < 0.0001 | 19.9           |                              | cob(II)irinic acid a.c-diamide reductase                              |                           |
| -                               | MSMEG_6055 | -               | -              | < 0.0001 | 25.5           | 498                          | hypothetical protein                                                  |                           |
| -                               | MSMEG_6057 | -               | -              | < 0.0001 | 393            | 435                          | MspD protein                                                          |                           |
| -                               | MSMEG_6058 | MAP3384 (77.7)  | Rv3270 (77.2)  | < 0.0001 | 9.59           | 9.21                         | cadmium transporting P-type ATPase                                    |                           |
| -                               | MSMEG_6059 | MAP3383 (69.1)  | Rv3269 (71.6)  | < 0.0001 | 11.73          | 13.42                        | hypothetical protein                                                  |                           |
| -                               | MSMEG_6062 | -               | Rv1473 (42.5)  | < 0.0001 | 5.04           | 5.97                         | Fe uptake system permease                                             |                           |
| -                               | MSMEG_6063 | -               | -              | < 0.0001 | 8.69           | 8.73                         | Fe uptake system integral membrane protein                            |                           |
| -                               | MSMEG_6064 | -               | -              | < 0.0001 | 21.76          | 27.42                        | lipoprotein                                                           |                           |
| rpsR                            | MSMEG_6065 | MAP3767c (63.9) | Rv2055c (63.4) | 10.000   | 3,080.0        | 5,107.67                     | 30S ribosomal protein S18                                             |                           |
| rpsN                            | MSMEG_6066 | MAP3768c (75.2) | Rv2056c (72.3) | 10.000   | 3,983.5        | 5,778.5                      | 30S ribosomal protein S14                                             |                           |
| rpmG                            | MSMEG_6067 | MAP3769c (92.6) | Rv2057c (87.0) | 10.000   | 5,015.0        | 5,856.67                     | 50S ribosomal protein L33                                             |                           |
| rpmB                            | MSMEG_6068 | -               | Rv2058c (82.1) | 10.000   | 4,055.32       | 7.17                         | 5,372.69                                                              | 50S ribosomal protein L28 |
| -                               | MSMEG_6069 | MAP3770 (57.8)  | Rv0106 (62.1)  | 10.000   | 4,340.0        | 3,492.0                      | CobW/P47K domain-containing protein                                   |                           |
| rpmE2                           | MSMEG_6070 | MAP3771 (79.3)  | -              | 10.000   | 1,603.0        | 1,460.33                     | 50S ribosomal protein L31                                             |                           |
| -                               | MSMEG_6071 | MAP0485c (66.9) | Rv3577 (68.3)  | < 0.0001 | 33.42          | 27.95                        | metallo-beta-lactamase superfamily protein                            |                           |
| -                               | MSMEG_6072 |                 |                | < 0.0001 | 5.0            |                              | citrate transporter                                                   |                           |
| -                               | MSMEG_6237 | -               | -              | < 0.0001 | -4.62          | -5.39                        | hypothetical protein                                                  |                           |
| -                               | MSMEG_6240 | -               | -              | < 0.0001 | -8.48          | -4.64                        | hypothetical protein                                                  |                           |
| -                               | MSMEG_6241 | MAP2246c (44.9) | Rv2426c (45.9) | < 0.0001 | -8.66          | -5.14                        | ATPase AAA                                                            |                           |
| -                               | MSMEG_6242 | -               | -              | < 0.0001 | -8.35          | -6.40                        | alcohol dehydrogenase                                                 |                           |
| -                               | MSMEG_6272 |                 |                | < 0.0001 | 12.44          |                              | NAD-glutamate dehydrogenase                                           |                           |

<sup>a</sup>Reference Common Name.<sup>d</sup>Putative function based on NCBI blastx analysis or tdb.org database.
